# Supplementary material
Source: PubMed Central journal article supplement (PMC6994125)
Supplement: jci-130-129308-s175.pdf [file jci-130-129308-s175.pdf]

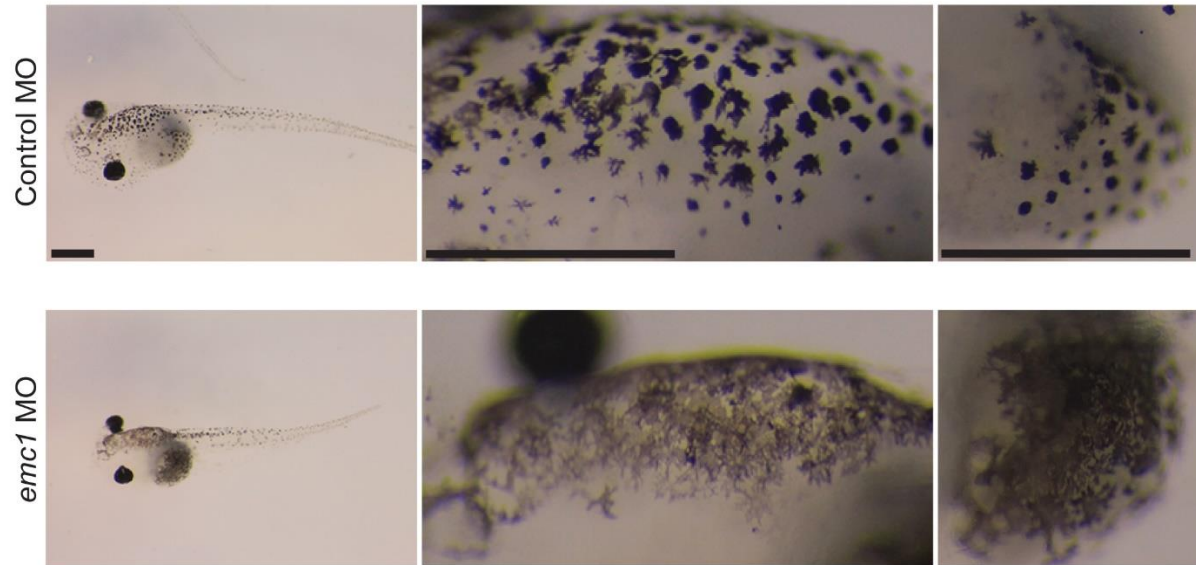

**Supplemental Figure 1** Knockdown of *emc1* causes abnormal pigment cell morphology. Representative images of control MO and *emc1* MO injected stage 45 embryo pigment cell morphology. 30 embryos were imaged for each condition over 3 biological replicates. Scale bar indicates 500  $\mu\text{m}$ .

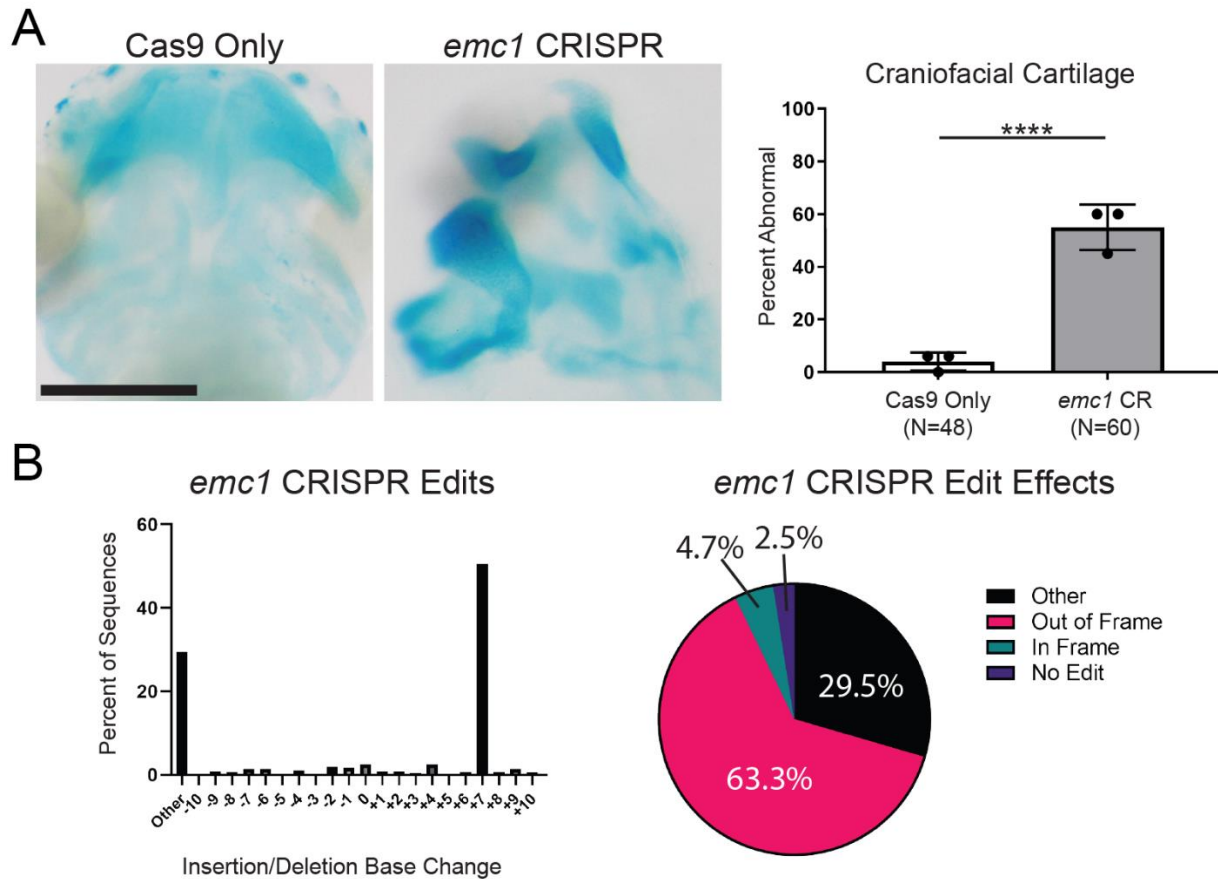

**Supplemental Figure 2** F0 CRISPR mosaic knockout of *emc1* causes abnormal craniofacial morphology. **(A)** Representative images and quantitation of Cas9 only (n=48) and Cas9 + *emc1* sgRNA injected (n=60) stage 45 embryos stained with Alcian blue over 3 biological replicates. Scale bar indicates 250  $\mu$ m. **(B)** Example TIDE analysis of insertion and deletion sizes along with their predicted effects in one embryo. This analysis of single embryos was carried out in 5 replicates to ensure consistent CRISPR mediated targeting. “Other” indicates changes that could not be analyzed via TIDE due to large size of indel. \*\*\*\*p < 0.0001 by Fisher’s exact test. Bars indicate mean and SD.

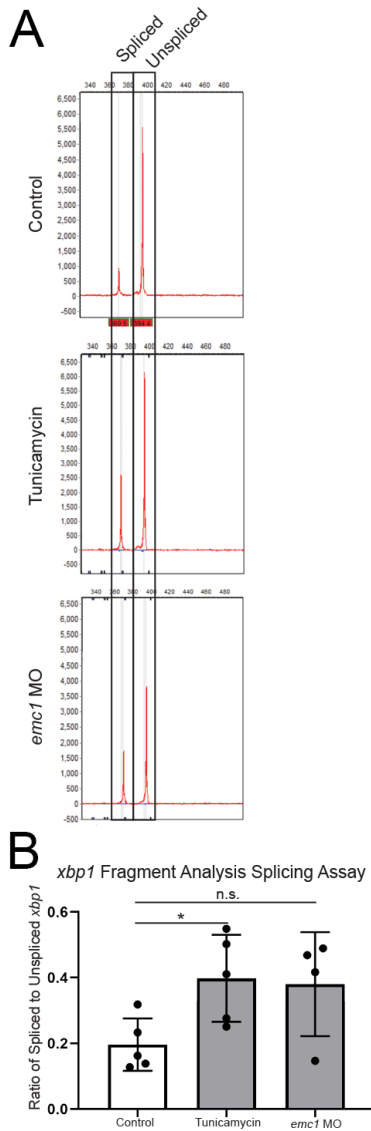

**Supplemental Figure 3** Fragment analysis of *xbp1* splicing demonstrates increased endoplasmic reticulum stress in *emc1* morphants. **(A)** Examples of traces obtained from fragment analysis for *xbp1* spliced and un-spliced forms in 4-5 replicates of 30 pooled stage 24 control embryos, tunicamycin (positive control) treated embryos, and *emc1* morphant embryos. **(B)** Ratios of area under the curve measurements corresponding to peaks of spliced to un-spliced forms of *xbp1* in stage 24 control embryos, tunicamycin (positive control) treated embryos, and *emc1* morphant embryos demonstrate an increase in *xbp1* splicing in *emc1* morphants. \* $p < 0.05$  by Student's T-test. Bars indicate mean and SD.

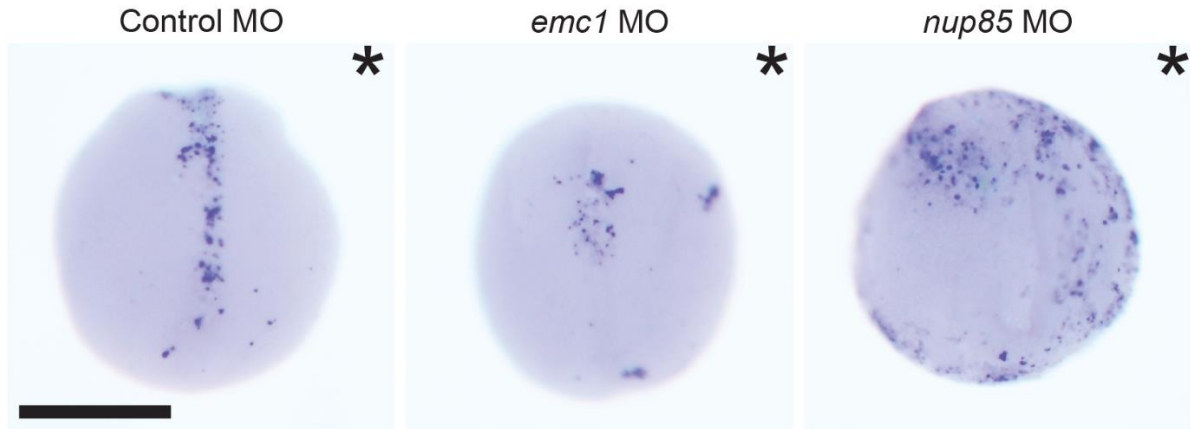

**Supplemental Figure 4** TUNEL staining for cell death of St 20 embryos injected with MO in one cell at the two-cell stage. Representative images of embryos injected with control, *emc1*, or *nup85* MO affecting half of the embryo (indicated by asterisk side). Three replicates of 10 embryos were analyzed for each condition. Scale bar indicates 500  $\mu$ m.

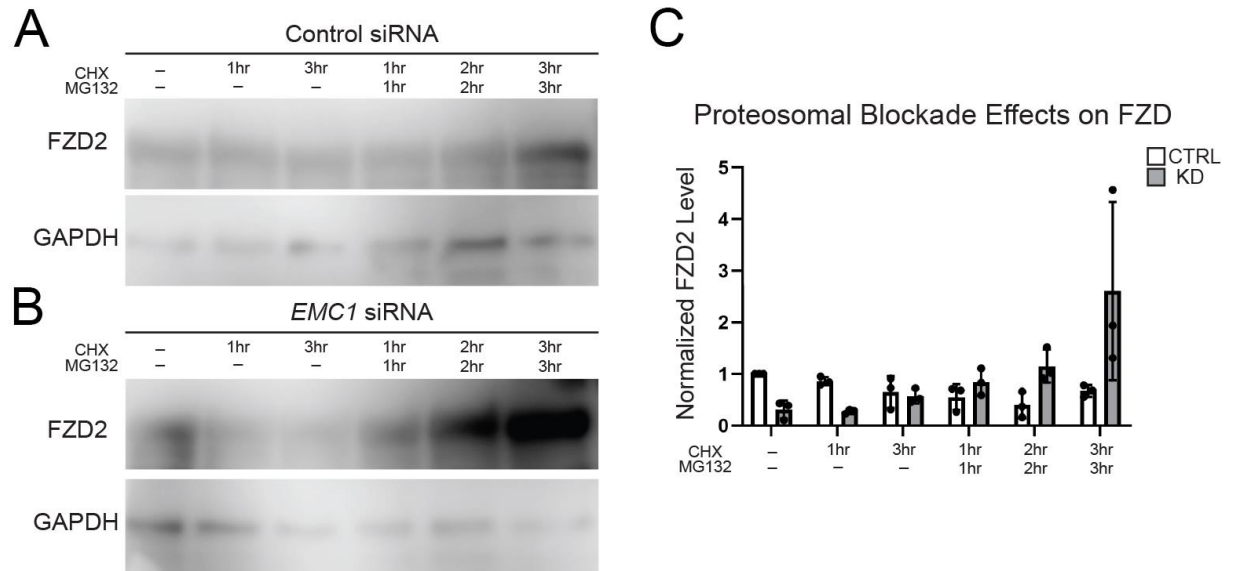

**Supplemental Figure 5** Immunoblot analysis of FZD2 levels reveals proteasomal degradation as the source of FZD2 clearance in *EMC1* depleted RPE cells. **(A)** Immunoblot of FZD2 in cells transfected with a control siRNA and subjected to either cycloheximide treatment alone or cycloheximide and MG132 proteasomal inhibition performed in 3 biological replicates. **(B)** Immunoblot of FZD2 in cells transfected with *EMC1* siRNA and subjected to either cycloheximide treatment alone or cycloheximide and MG132 proteasomal inhibition performed in 3 biological replicates. **(C)** Normalized densitometry of FZD2 levels from immunoblot assays. Bars indicate mean and SD.

## *EMC1* Expression During hNCC Induction

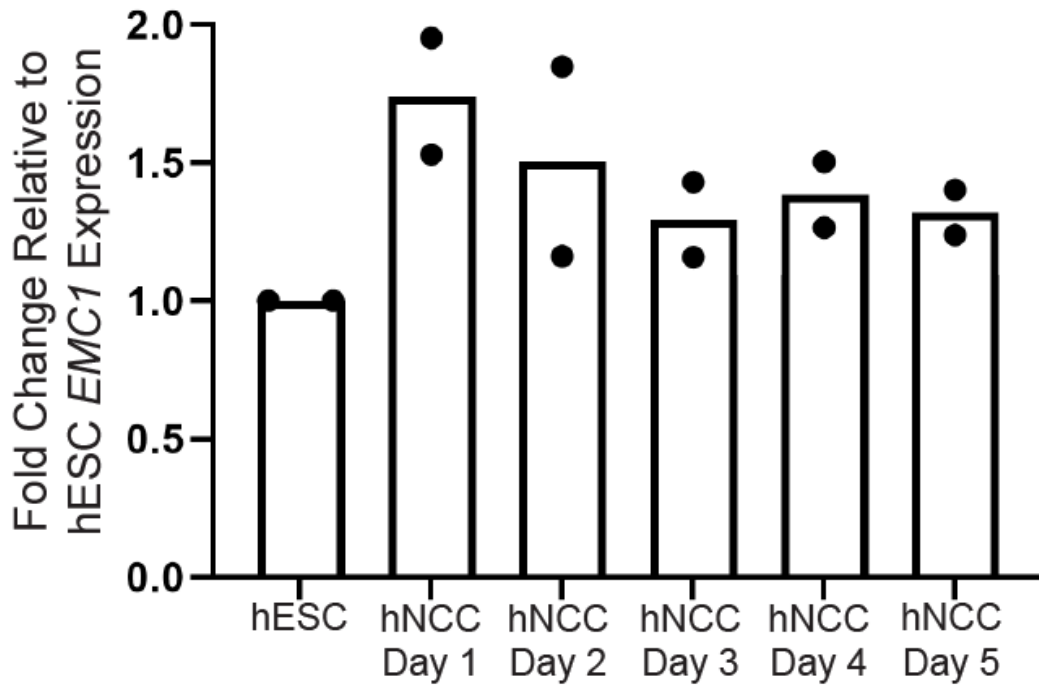

**Supplemental Figure 6** *EMC1* expression during early human neural crest cell induction. qPCR analysis of *EMC1* transcripts during the human NCC induction protocol shows a sustained level of *EMC1* transcripts within one day after beginning induction for 2 biological replicates at each time point.

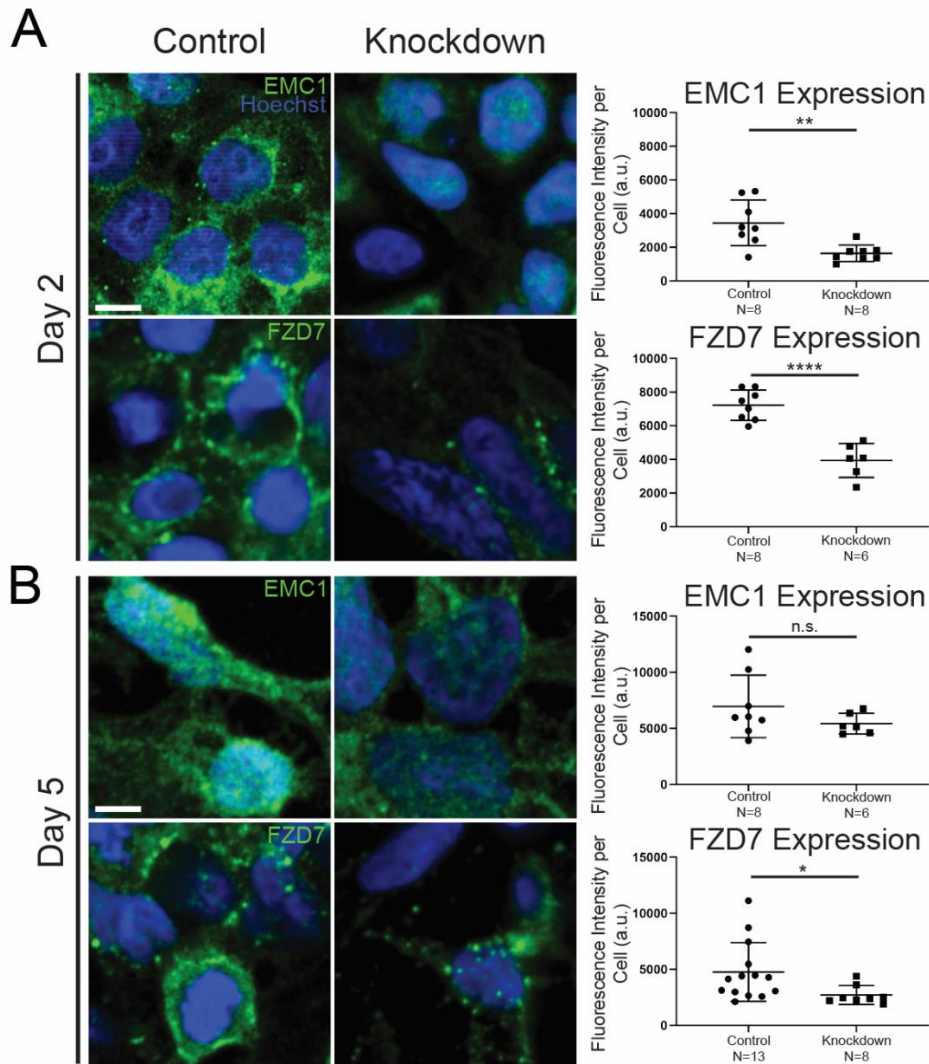

**Supplemental Figure 7** *EMC1* knockdown via siRNA results in decreased FZD7 in hESC

derived neural crest cells. **(A)** Immunofluorescence antibody labeling of EMC1 and FZD7 at day 2 of neural crest induction reveals a decrease in both as well as a more punctate appearance in residual FZD7 signal as compared to control siRNA treated cells. Cells in 3 replicates of 2-3 high power fields were assessed for each marker per condition. Scale bar indicates 5  $\mu$ m. **(B)** Immunofluorescence antibody labeling of EMC1 and FZD7 at day 5 of neural crest induction reveals a recovery in EMC1 while FZD7 remains diminished and in a punctate pattern. Cells in 3 replicates of 2-4 high power fields were assessed for each marker per condition. Scale bar indicates 5  $\mu$ m. Bars indicate mean and SD.

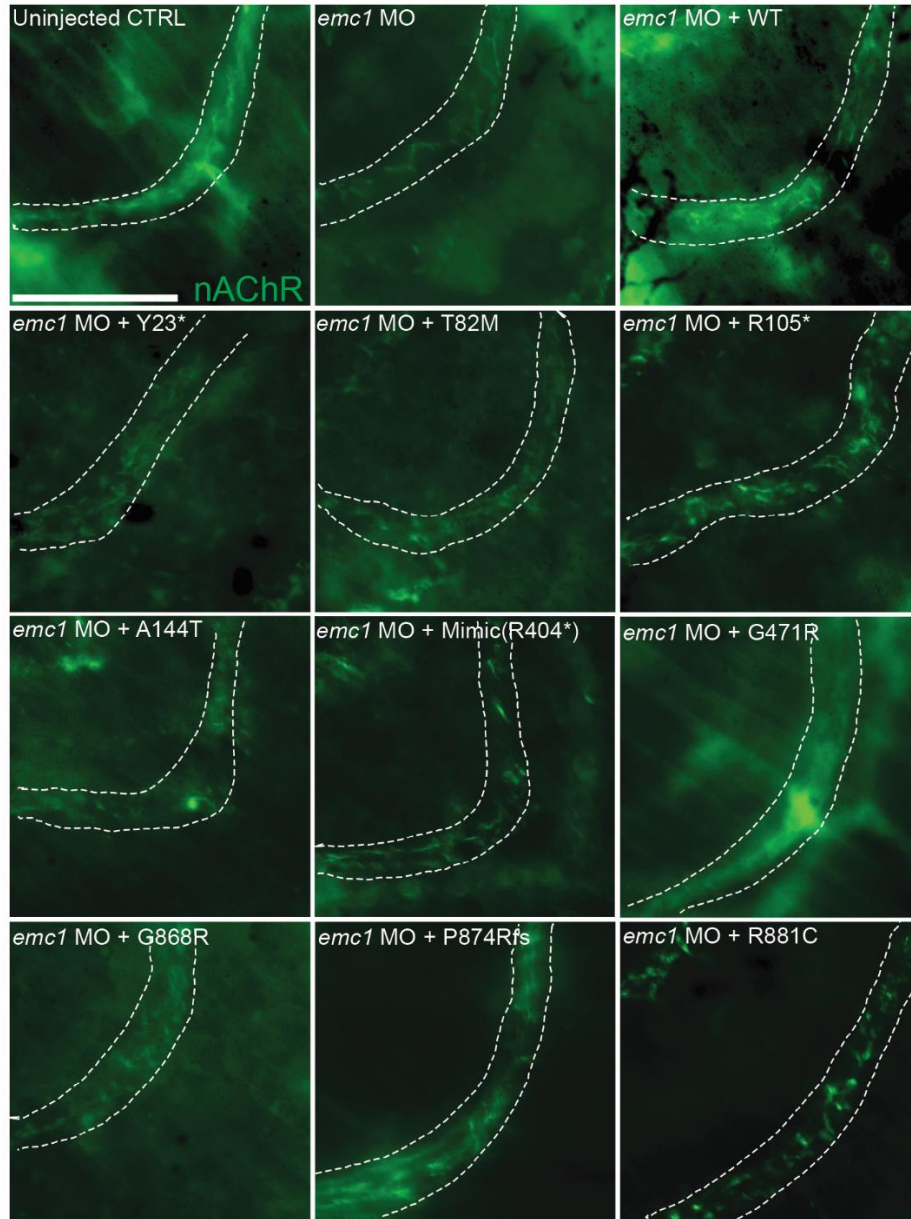

**Supplemental Figure 8** Knockdown of *emc1* in *Xenopus* results in abnormal nAChR signal in tail neuromuscular junctions that can be rescued through exogenous introduction of human *EMC1*. Injection of wildtype *EMC1* mRNA and to a lesser extent p.Gly471Arg (c.1411G>C) variant mRNA restores nAChR patterns of expression in *emc1* depleted tail neuromuscular tissue while mRNA of other variants do not. Three replicates of 8 embryos were analyzed for each condition. Scale bar indicates 50  $\mu$ m. Images of uninjected control and *emc1* MO labeling of nAChR are from subregions of images shown in Figure 4C.



| <i>EMC1</i> Variant           | Acquisition | Zygoty | Change in Coding Sequence | Change in Amino Acid Sequence           | Effect                  | ExAC MAF   | Source                | Phenotype                                                                    |
|-------------------------------|-------------|--------|---------------------------|-----------------------------------------|-------------------------|------------|-----------------------|------------------------------------------------------------------------------|
| chr1:19577935G>C              | Inherited   | Het    | c.69C>G                   | p.Tyr23Stop                             | Stopgain                | 0          | Jin et al 2017        | Total Anomalous Pulmonary Vascular Return + Atrial Septal Defect             |
| chr1:19577907A>T              | Inherited   | Het    | c.96-2A>T                 | Unknown                                 | Splice                  | 0          | Jin et al 2017        | Transposition of the Great Vessels + Ventricular Septal Defect               |
| chr1:19570485G>A              | Inherited   | Hom    | c.245C>T                  | p.Thr82Met                              | Missense                | 0          | Harel et al 2016      | Global Developmental Delay                                                   |
| chr1:19570175G>A              | Inherited   | Het    | c.313C>T                  | p.Arg105Stop                            | Stopgain                | 0          | Jin et al 2017        | Tetralogy of Fallot                                                          |
| chr1:19568918C>T              | Inherited   | Hom    | c.430G>A                  | p.Ala144Thr                             | Missense                | 0          | Abu-Safieh et al 2013 | Retinitis Pigmentosa                                                         |
| chr1:19564510C>T              | Inherited   | Hom    | c.1212+1G>A               | Truncated protein after exon 11 product | Splice (premature stop) | 0          | Geetha et al 2017     | Cerebellar Atrophy, Visual Impairment, Psychomotor Retardation with Epilepsy |
| chr 1:19561645C>G             | De Novo     | Het    | c.1411G>C                 | p.Gly471Arg                             | Missense                | 0          | Harel et al 2016      | Global Developmental Delay                                                   |
| chr1:19547328C>T              | Inherited   | Hom    | c.2602G>A                 | p.Gly868Arg                             | Missense                | 0          | Harel et al 2016      | Global Developmental Delay                                                   |
| chr1:19547308-19547311delAGGA | Inherited   | Hom    | c.2619_2622delTCCT        | p.Pro874Arg*fs                          | Frame Shift             | 0          | Harel et al 2016      | Global Developmental Delay                                                   |
| chr1:19547289G>A              | De Novo     | Het    | c.2641C>T                 | p.Arg881Cys                             | Missense                | 0.00002478 | Homsy et al 2015      | Bicommissural Aortic Valve                                                   |

**Supplemental Table 1 Previously identified *EMC1* variants.**

| <b>qPCR Primers</b> |                         |                          |                |
|---------------------|-------------------------|--------------------------|----------------|
| <b>Gene</b>         | <b>Forward</b>          | <b>Reverse</b>           | <b>Species</b> |
| <i>EMC1</i>         | AAAAAGGCAGATGGCTTGCTG   | TCTTAATCTGACTCCGGGGCT    | Homo sapiens   |
| <i>PAX3</i>         | GAACCCGGGCATGTTTCAG     | ACGGCACGGTGTTCGA         | Homo sapiens   |
| <i>PAX7</i>         | GCGACTCCGGATGTAGAGAA    | ATCCTTCAGCAGCCTGTCC      | Homo sapiens   |
| <i>SOX9</i>         | CCCCAACAGATCGCCTACAG    | GAGTTCTGGTGGTCCGGTGTAGTC | Homo sapiens   |
| <i>SNAI2</i>        | GATCCTCAGCTCAGGAGCATACA | GGAGTATCCGAAAGAGGAGAGA   | Homo sapiens   |
| <i>FOXD3</i>        | TCATCACCATGGCCATCCT     | GGAAGCGTTGCTGATGAAC      | Homo sapiens   |
| <i>SOX10</i>        | GAGGCTGCTGAACGAAAGTGA   | GCGGCCTTCCCGTTCT         | Homo sapiens   |

| <b>rtPCR Primers</b> |                      |                        |                    |
|----------------------|----------------------|------------------------|--------------------|
| <b>Gene</b>          | <b>Forward</b>       | <b>Reverse</b>         | <b>Species</b>     |
| <i>xbp1</i>          | GACTGCTCGGGACAGGAAAA | GCCCAACAAGAGATCAGACTCA | Xenopus tropicalis |

| <b>Antibodies</b>                                 | <b>Vendor</b>                        | <b>Catalog</b> | <b>Dilution</b>       | <b>Species Raised In</b> |
|---------------------------------------------------|--------------------------------------|----------------|-----------------------|--------------------------|
| $\alpha$ -BUNGAROTOXIN (labeling of NACHRs) AF488 | Thermo Fisher Scientific             | B13422         | 1:1000                | Bungarus multicinctus    |
| <i>EMC1</i>                                       | Thermo Fisher Scientific             | PA5-23732      | 1:100 IF<br>1:1000 WB | Rabbit                   |
| <i>FZD2</i>                                       | Abcam                                | ab109094       | 1:100 IF<br>1:1000 WB | Goat                     |
| <i>FZD7</i>                                       | Abcam                                | ab64636        | 1:100 IF<br>1:1000 WB | Rabbit                   |
| <i>PAX3</i>                                       | Developmental Studies Hybridoma Bank | Pax3           | 1:10                  | Mouse                    |
| <i>PAX7</i>                                       | Developmental Studies Hybridoma Bank | Pax7           | 1:10                  | Mouse                    |
| <i>RHO</i>                                        | Santa Cruz Biotechnology             | sc-57432       | 1:200                 | Mouse                    |
| <i>GAPDH</i>                                      | Novus Biologicals                    | NB600-502      | 1:1000                | Mouse                    |
| <i>HRP-<math>\beta</math>-ACTIN</i>               | Santa Cruz Biotechnology             | sc-47778       | 1:30000               | Mouse                    |
| AF488 anti-mouse                                  | Life Technologies                    | A21200         | 1:1000                | Chicken                  |
| AF488 anti-rabbit                                 | Life Technologies                    | A21441         | 1:1000                | Chicken                  |
| AF488 anti-goat                                   | Life Technologies                    | A11055         | 1:1000                | Donkey                   |
| <i>HRP anti-mouse</i>                             | Jackson ImmunoResearch               | 115-035-003    | 1:10000               | Goat                     |
| <i>HRP anti-rabbit</i>                            | Jackson ImmunoResearch               | 111-035-003    | 1:10000               | Goat                     |
| <i>HRP anti-goat</i>                              | Jackson ImmunoResearch               | 705-035-003    | 1:10000               | Rabbit                   |

**Supplemental Table 3 Primer and Antibody Information**
